# Supplementary material
Source: publisher figshare collection journal article supplement (https://geolsoc.figshare.com/ndownloader/files/22477880)

# Properties and distribution of lower crustal bodies on the mid-Norwegian margin

Reynir Fjalar Reynisson<sup>(1,2,3)</sup>, Jörg Ebbing<sup>(2,1)</sup>, Erik Lundin<sup>(3)</sup>, Per Terje Osmundsen<sup>(2)</sup> and Odleiv Olesen<sup>(2)</sup>

<sup>(1)</sup>Department of Petroleum Engineering and Applied Geophysics, Norwegian University of Science and Technology, Trondheim, Norway <sup>(2)</sup>Geological Survey of Norway, Trondheim, Norway <sup>(3)</sup>StatoilHydro, Trondheim, Norway (rrey@statoilhydro.com)

## Introduction

The mid-Norwegian margin comprises the Møre, Vøring and Lofoten-Vesterålen margin segments. Anomalously high velocity and high density bodies have been detected in the lower crust on the margin. The lower crustal bodies (LCB) are pronounced on the Møre and Vøring margins segments and have mainly been interpreted as magmatic underplate. Evolutionary models of the whole margin are heavily affected by the interpretation of the lower crustal bodies and so are estimates of vertical movements and thermal structure in the area.

## 3D Models

3D density and magnetic models of the mid-Norwegian margin segments were compiled to map the main geological features of the margin and define the distribution of the lower crustal bodies. The models utilize the most recent potential field compilations and are constrained by extensive reflection seismic data and published refraction profiles. Further constraints on the model were attained from studying the isostatical state of the lithosphere and thermal modelling. We present a map showing the distribution of the different lower crustal bodies and discuss the implications for the structural and thermal evolution of the margin.

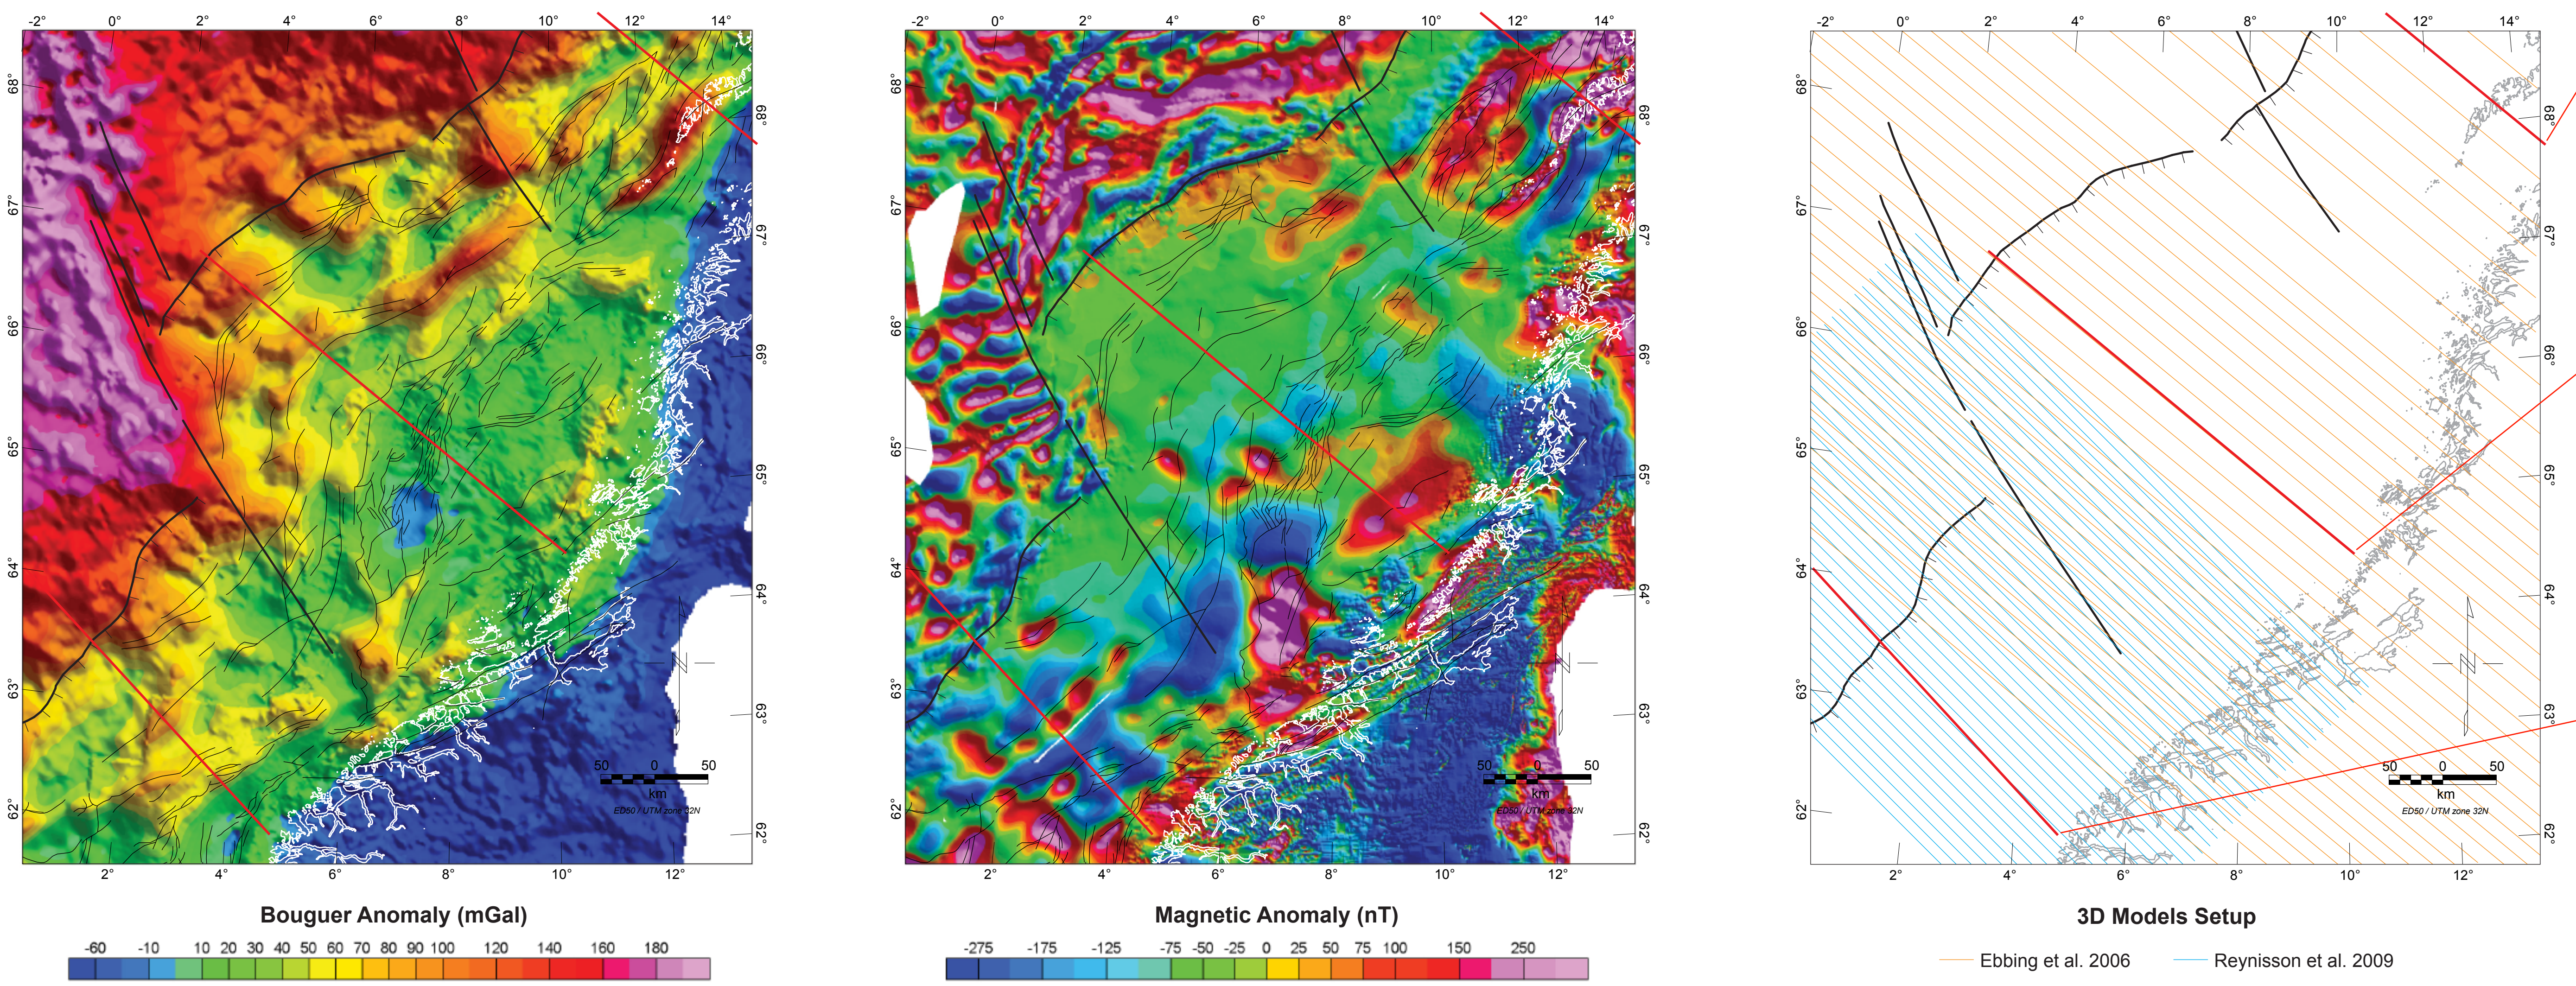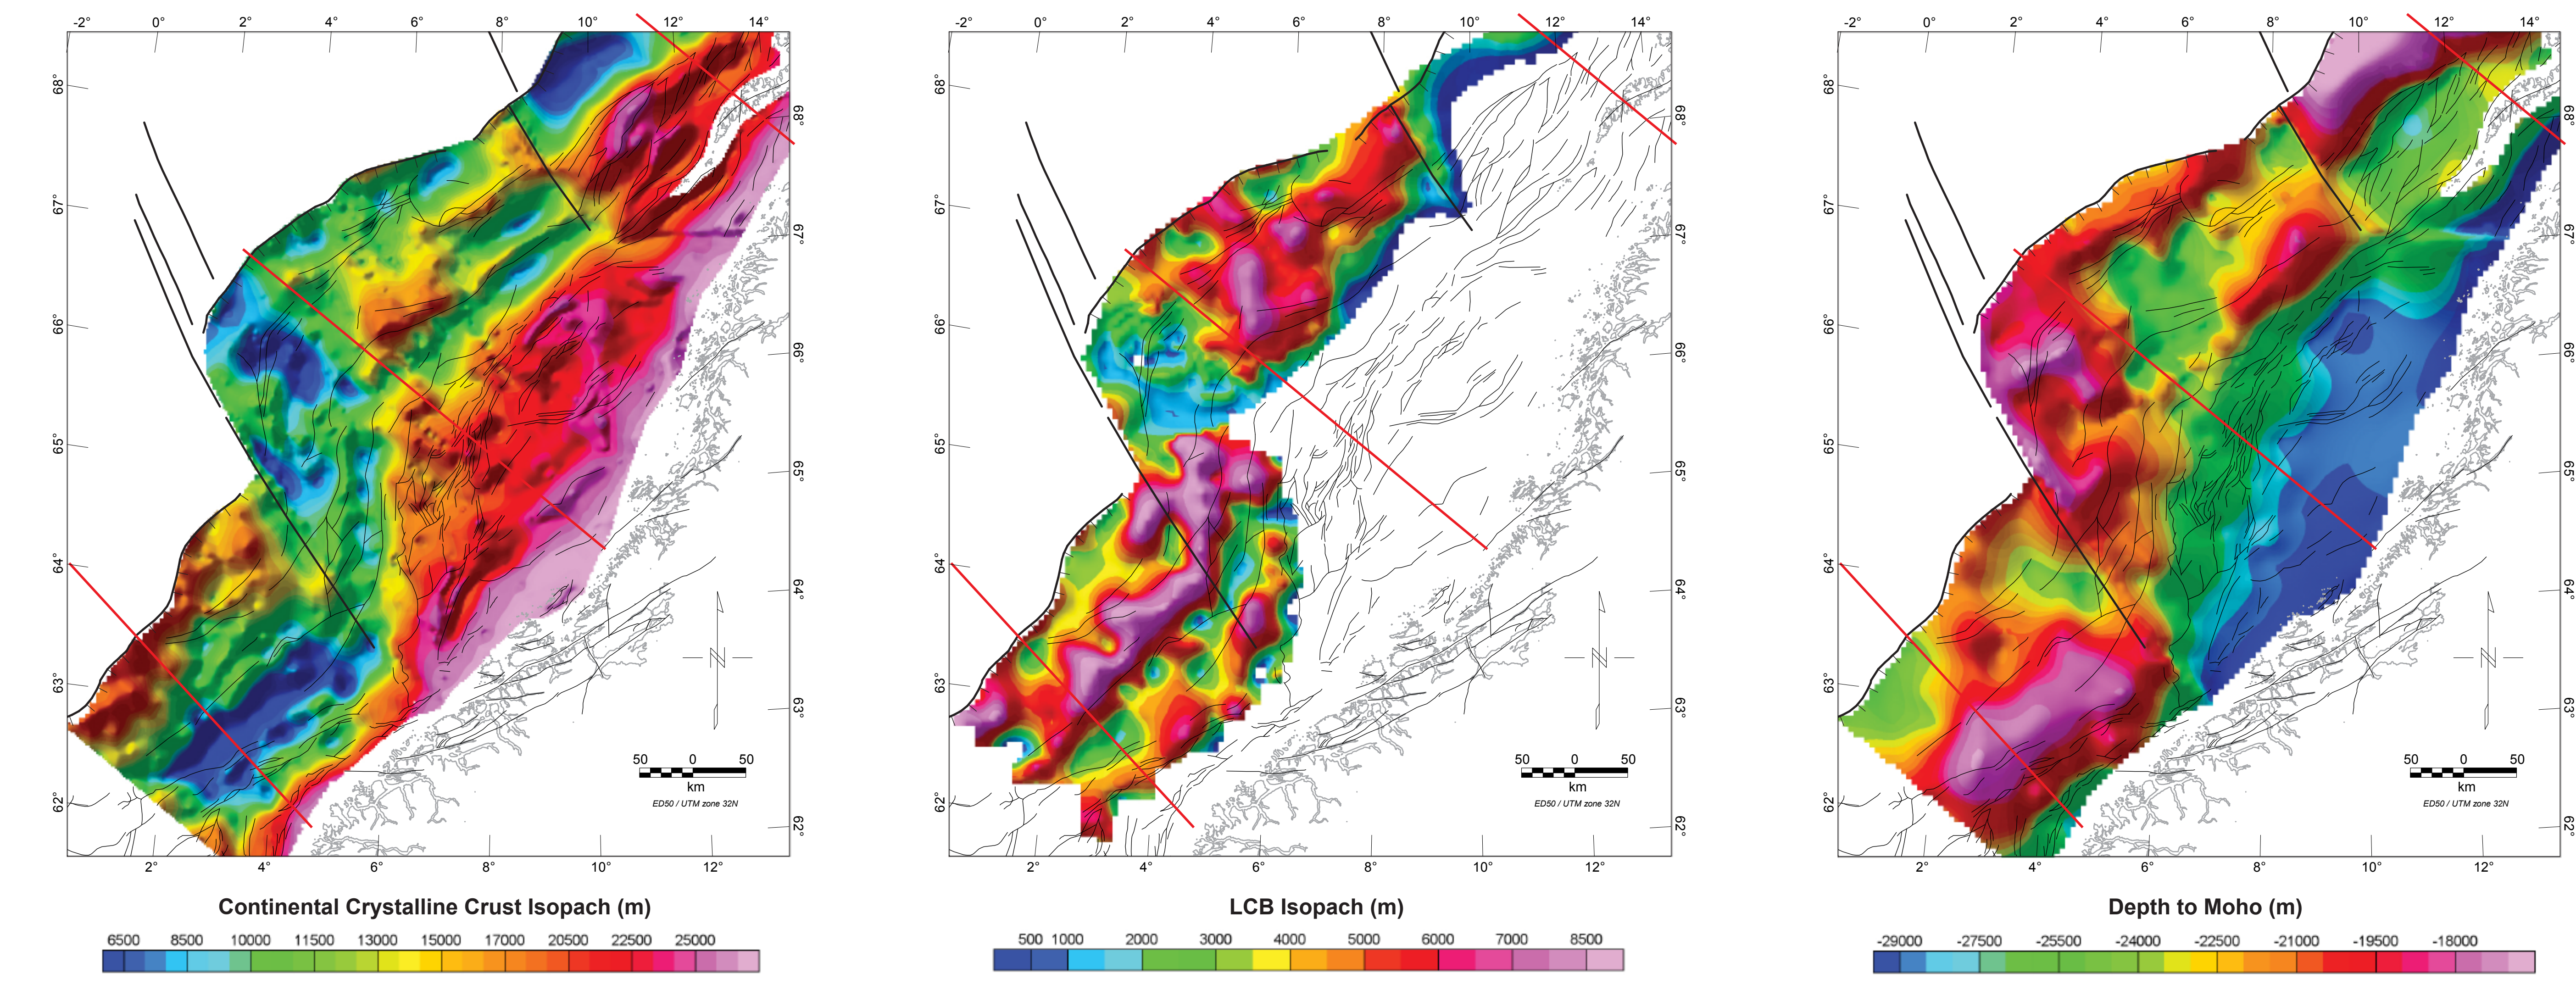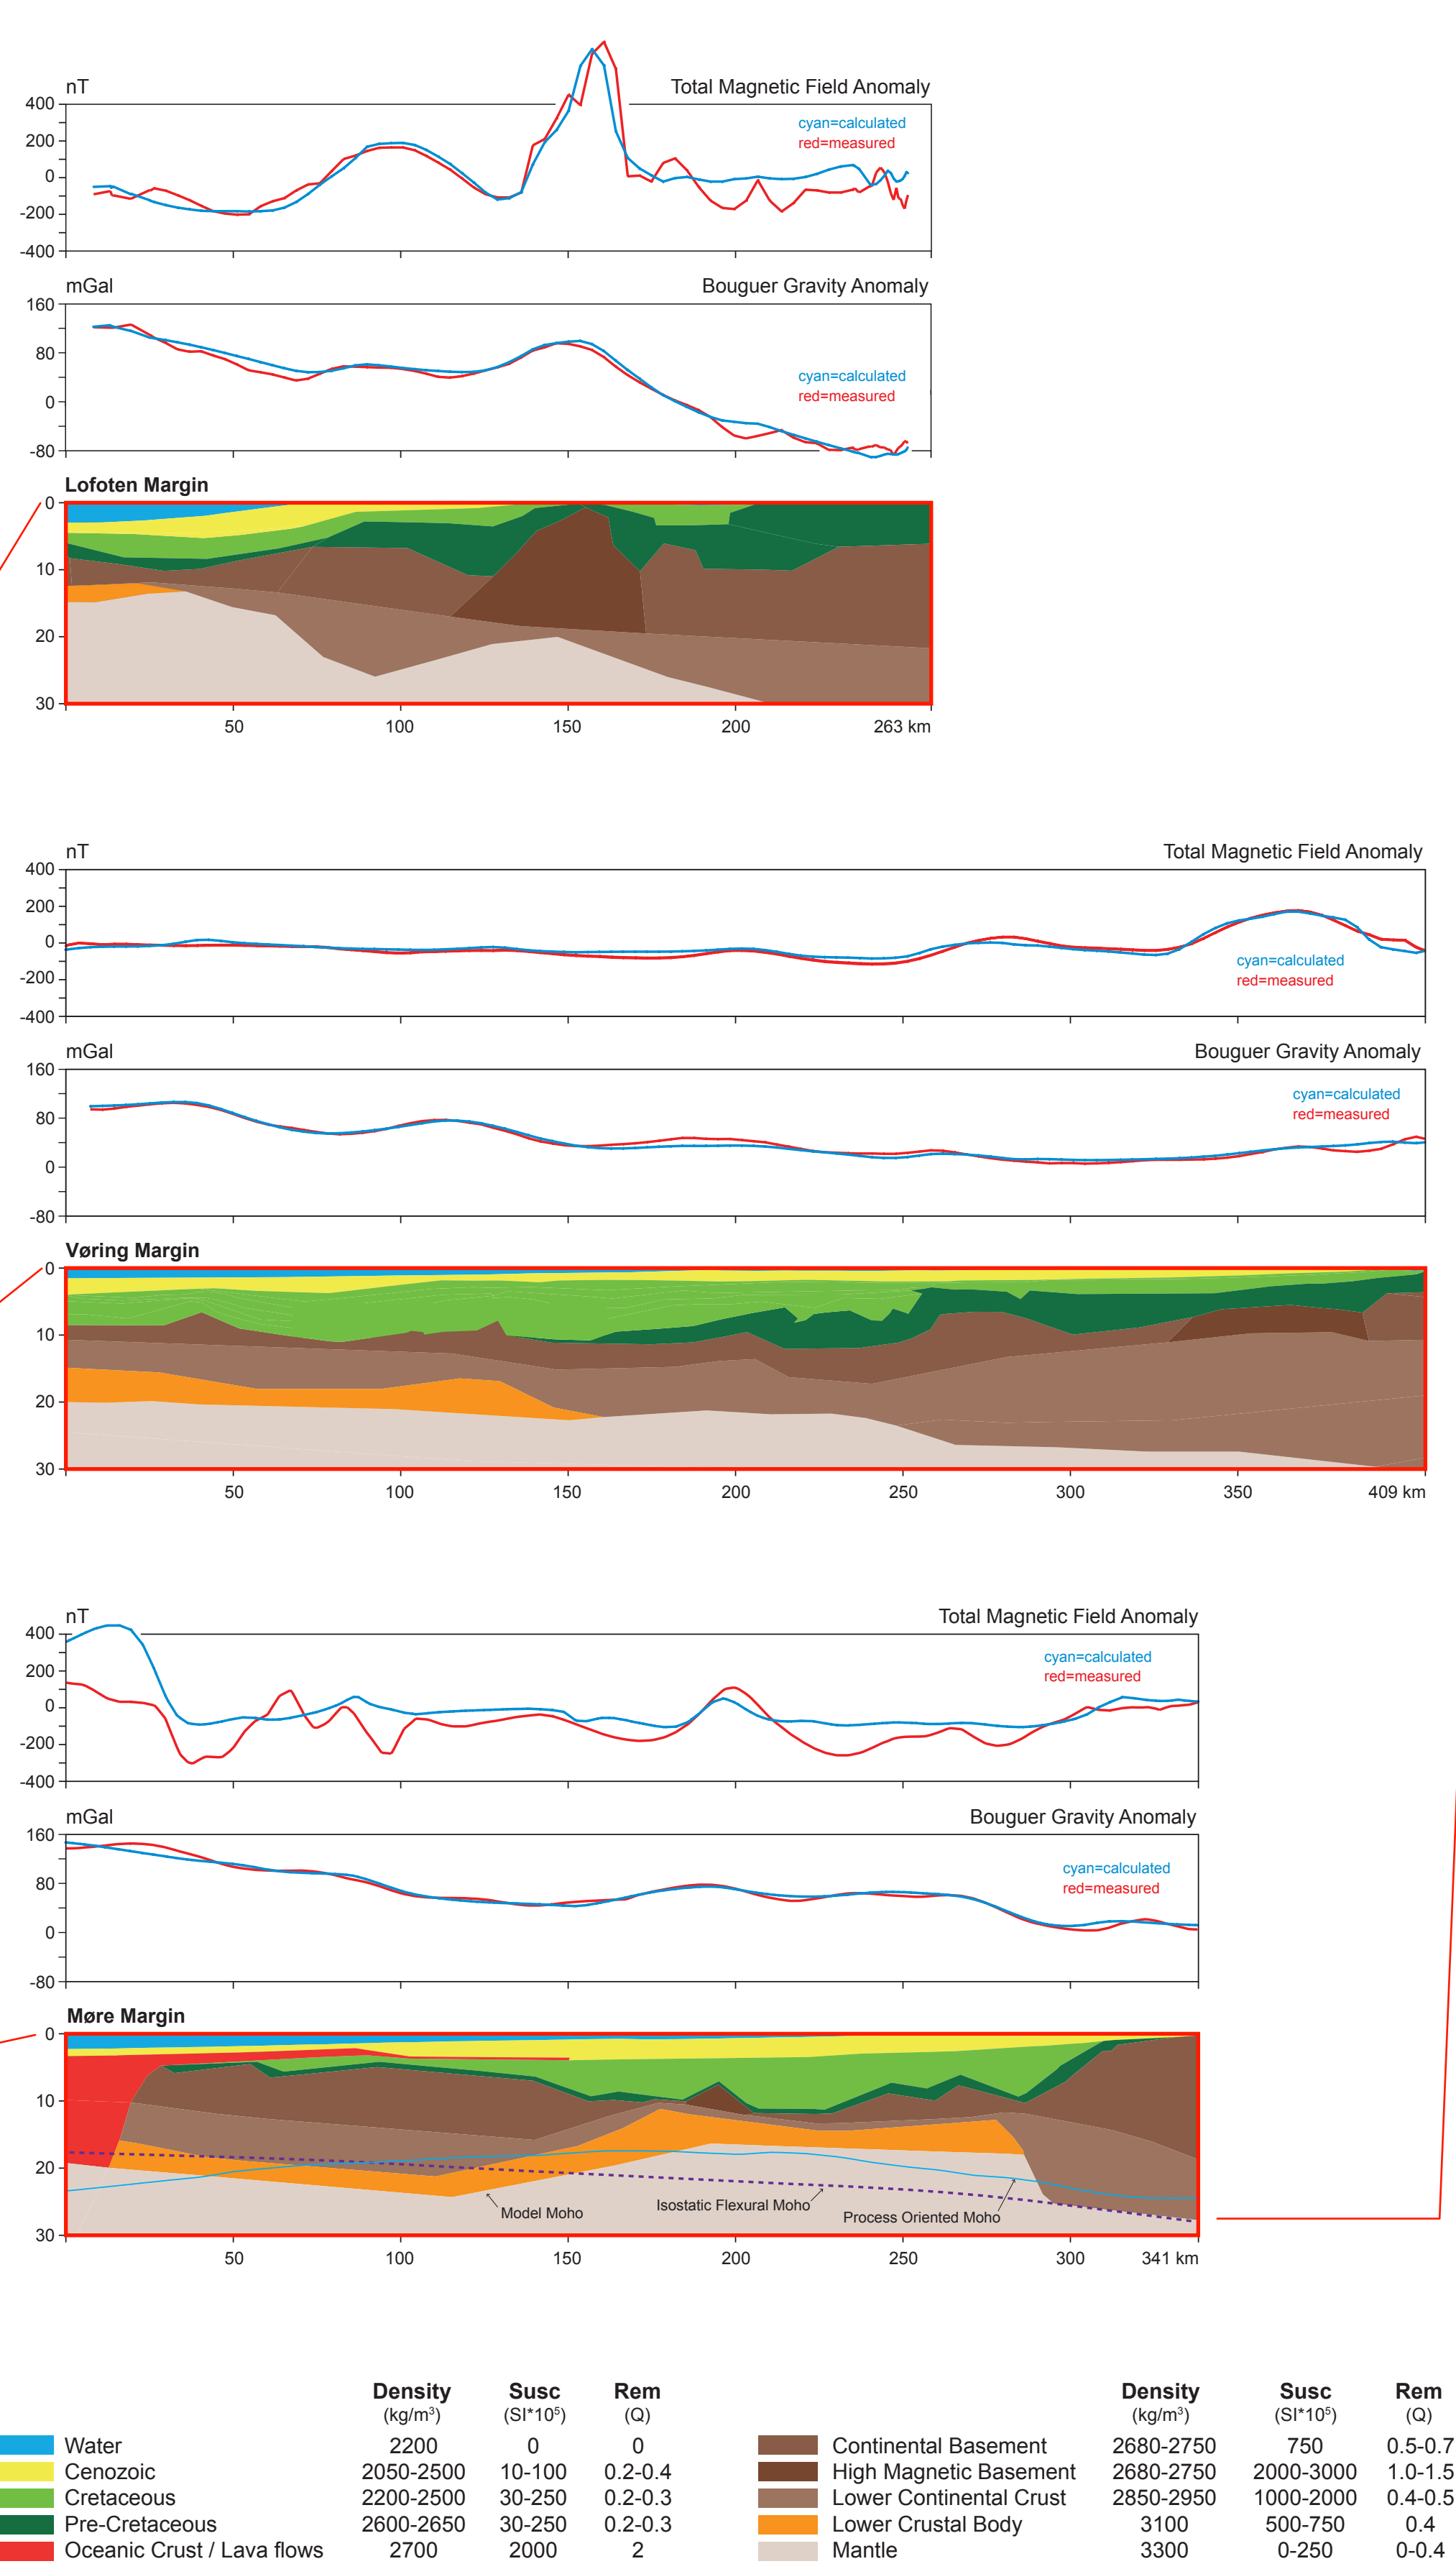

## Isostatic Considerations

Isostatic flexural Moho was calculated ( $T=10$ ) and compared to the model Moho. The difference map demonstrates how the model Moho is deeper than the isostatic Moho close to the escarpments but shallower in the center of the basins. Because a high density body is part of the model, while it is not part of the isostatical calculations, it is problematic to explain the shallow model Moho without assigning the high density body to a density mantle anomaly. In order to reconstruct this Moho configuration with isostatic and flexural considerations a process oriented approach is needed.  $T=5$  value during rifting and  $T=25$  during sedimentation managed to reconstruct the Moho geometry below the Møre basin.

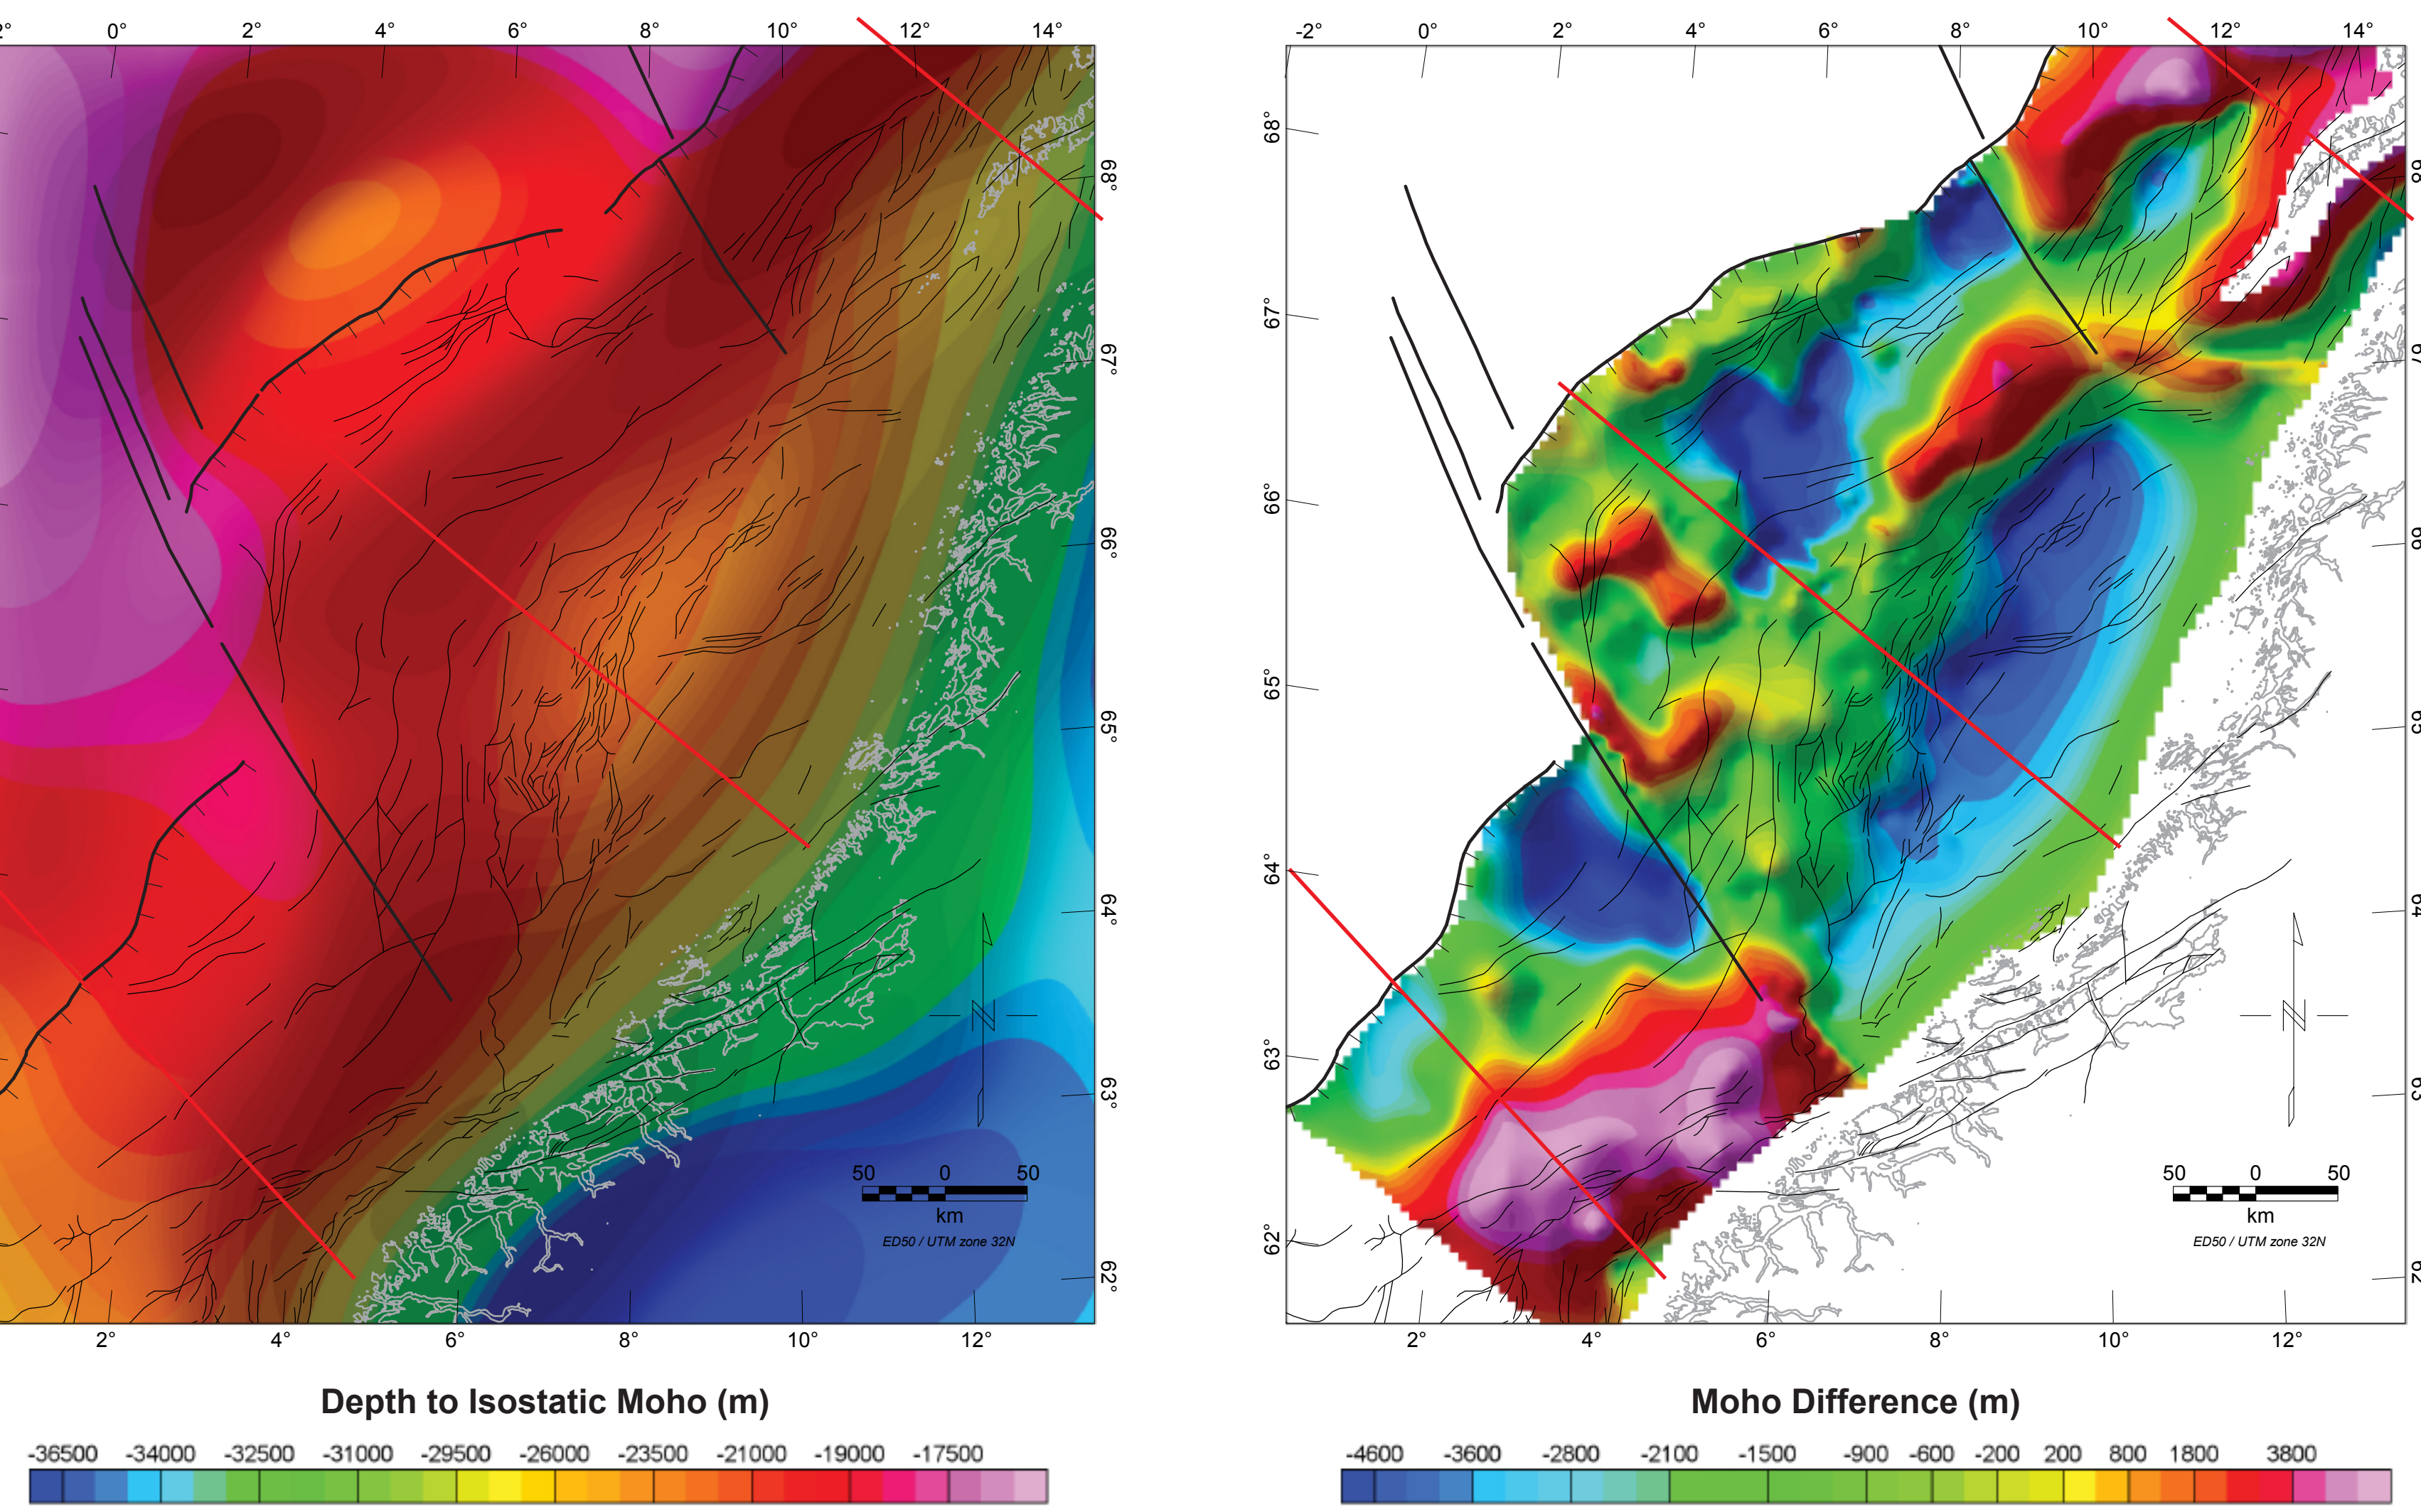

## Indications of origin

The mid-Norwegian margin tectonic evolution includes three events that each can be related to the generation of high velocity lower crust.

- 1) High grade metamorphism during the Caledonian orogeny. Such rocks are exposed both onshore Norway and East Greenland. The intervening margins must have been subject to similar high grade metamorphism.
- 2) Slow and extreme extension during the Cretaceous rifting led to serpentinization of exhumed mantle.
- 3) Rapid opening of NE Atlantic in Eocene time led to large melt generation along the break-up axis.

## Implications

The heat flow in a given basin will vary strongly depending on which of above mechanisms generated the LCB.

- HOT**
- Underplating**  
Significant crustal/lithospheric thinning  
Thick magmatic underplate adds significant heat
  - Serpentinized mantle**  
Significant crustal/lithospheric thinning, but slow and not so hot  
No heat from a magmatic body  
Some heat from exothermic reaction
  - Remnants from Caledonian root**  
No thermal addition
- COLD**

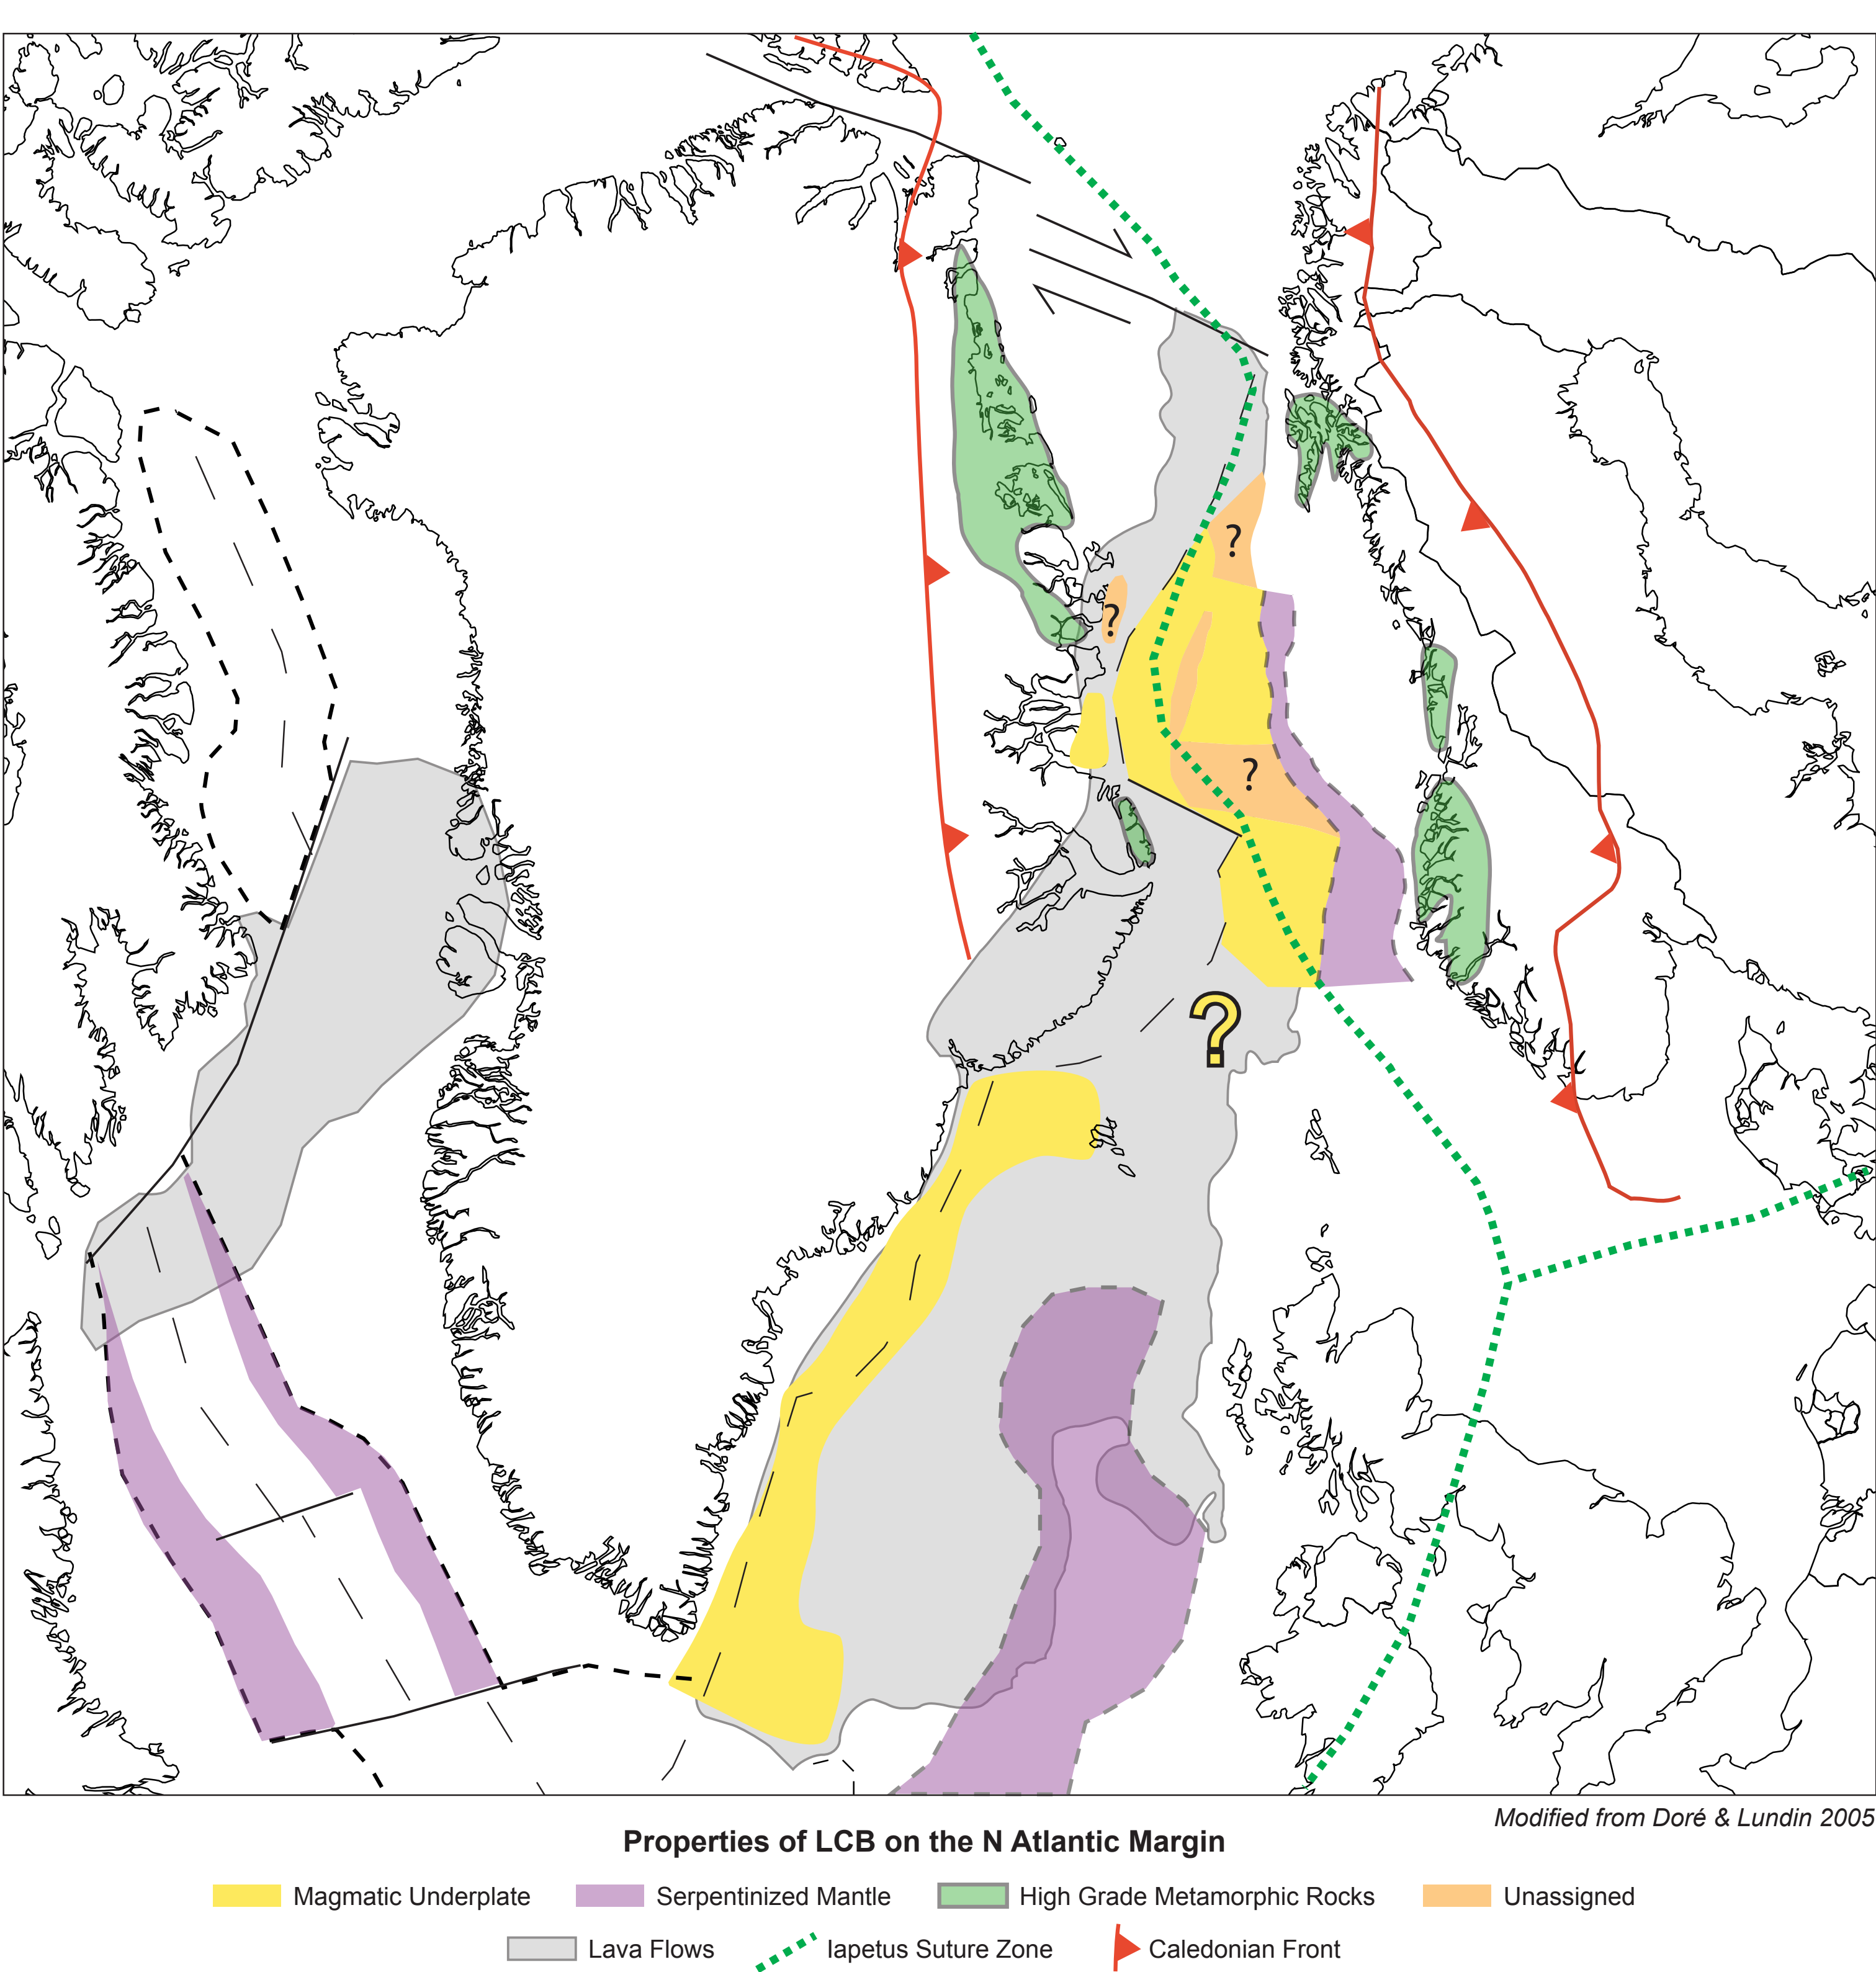

## Acknowledgement

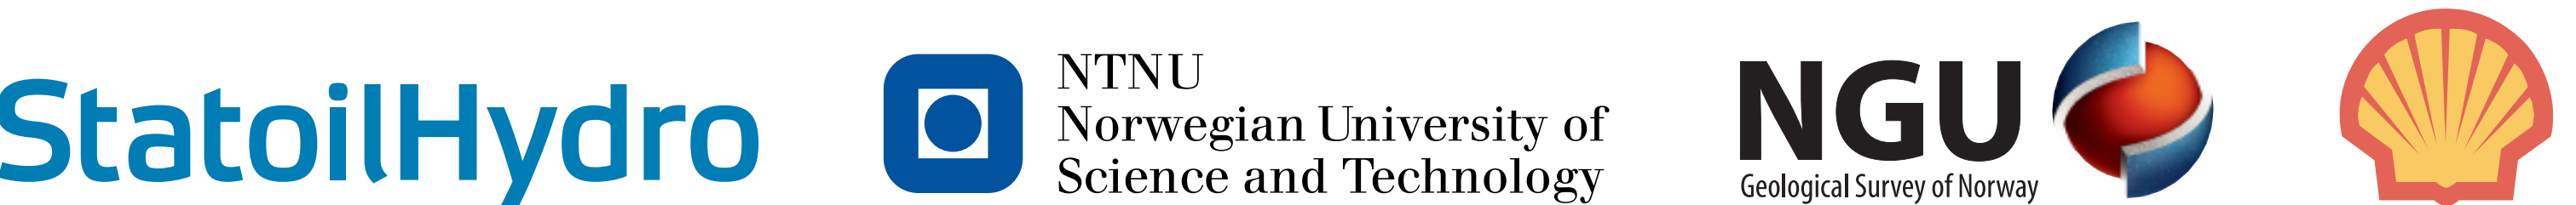

Supplement: Supplementary file 1 [file 22477880]
